# Supplementary material
Source: bioRxiv or medRxiv preprint supplement (https://medrxiv.org/highwire/filestream/69235/field_highwire_adjunct_files/0/19001834-1.pdf)
Supplement: Supplementary file [file 19001834-1.pdf]

## Supplementary Figures

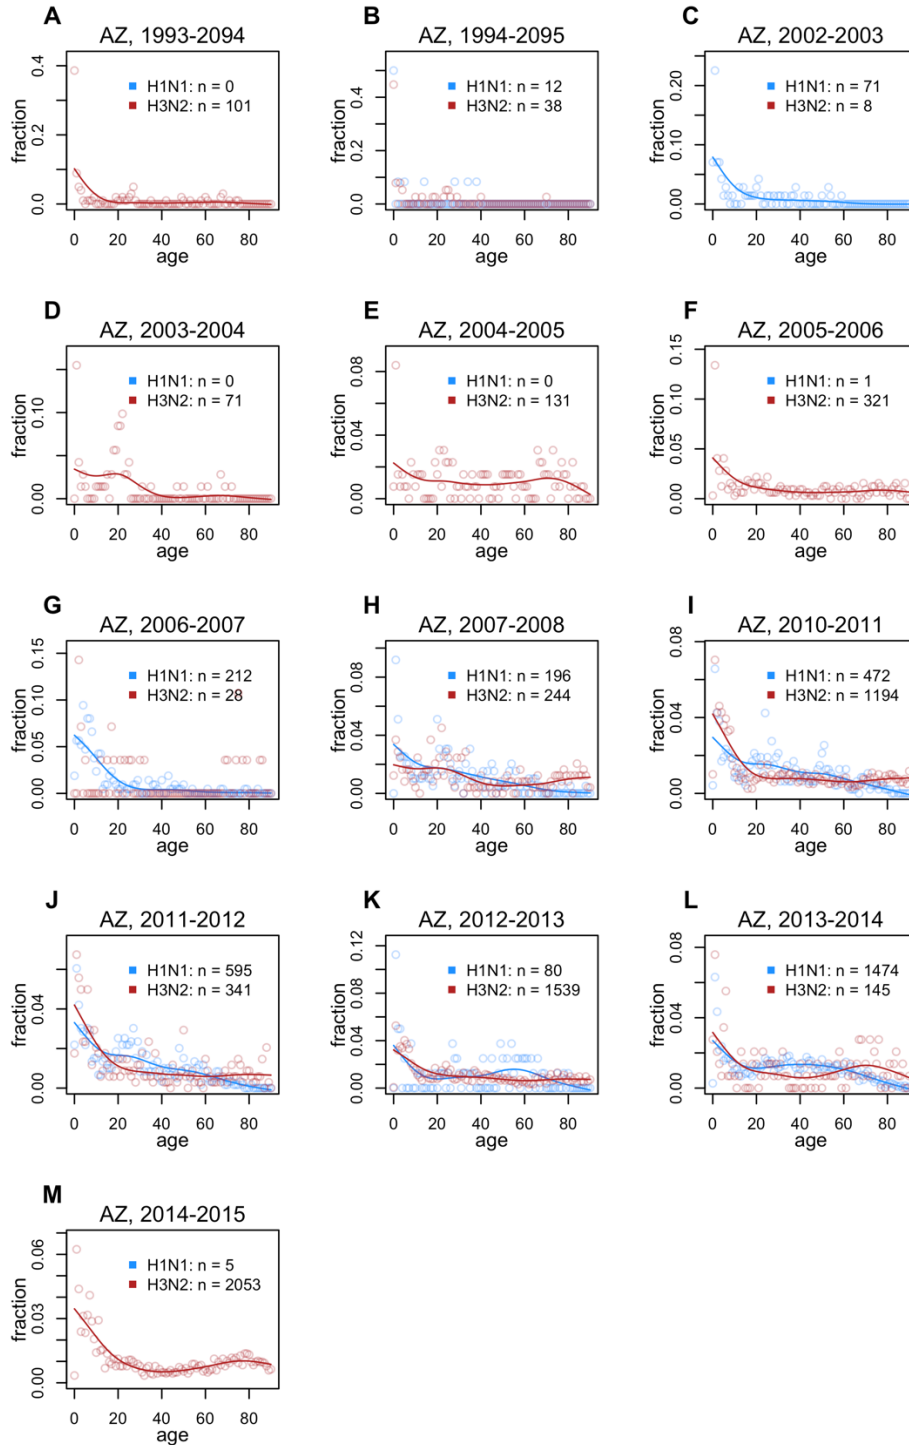

2

3 **Figure S1. ADHS age distributions, all seasons.** Supplement to *Fig. 2* showing observed age  
4 distributions from all influenza seasons. Observed case fractions (points) were only plotted if 10 or more  
5 cases of a given subtype were confirmed, to avoid extreme stretching of the y axis. Smoothing splines  
6 were only plotted if 50 or more cases of a given subtype were observed, as fits to fewer data points would  
7 not have been meaningful.

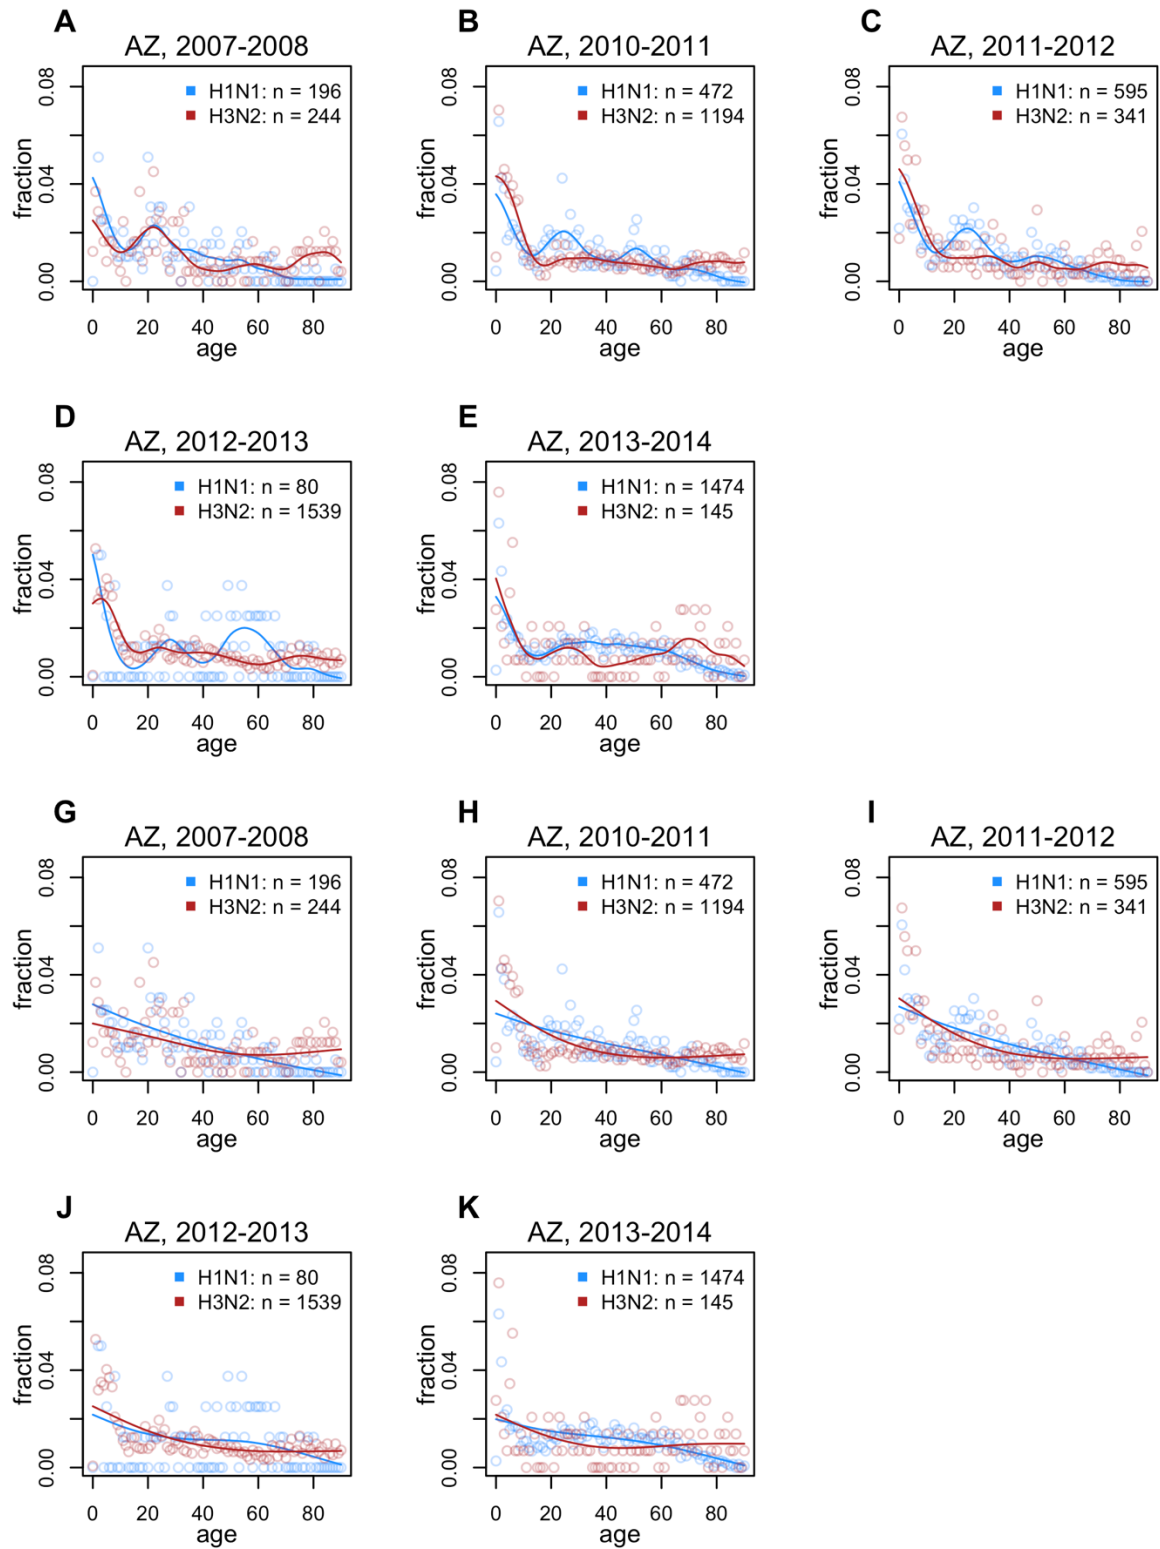

8  
9 **Figure S2. Alternate smoothing parameters, AZDHS data.** Supplement to *Fig. 2*, with smoothing  
10 parameters chosen to fit splines that are less (A-F), or more (G-L) smooth than the splines shown in the  
11 main text. Differences between H1N1 and H3N2's age-specific impacts remain evident, especially in the  
12 oldest cohorts, regardless of smoothness.  
13

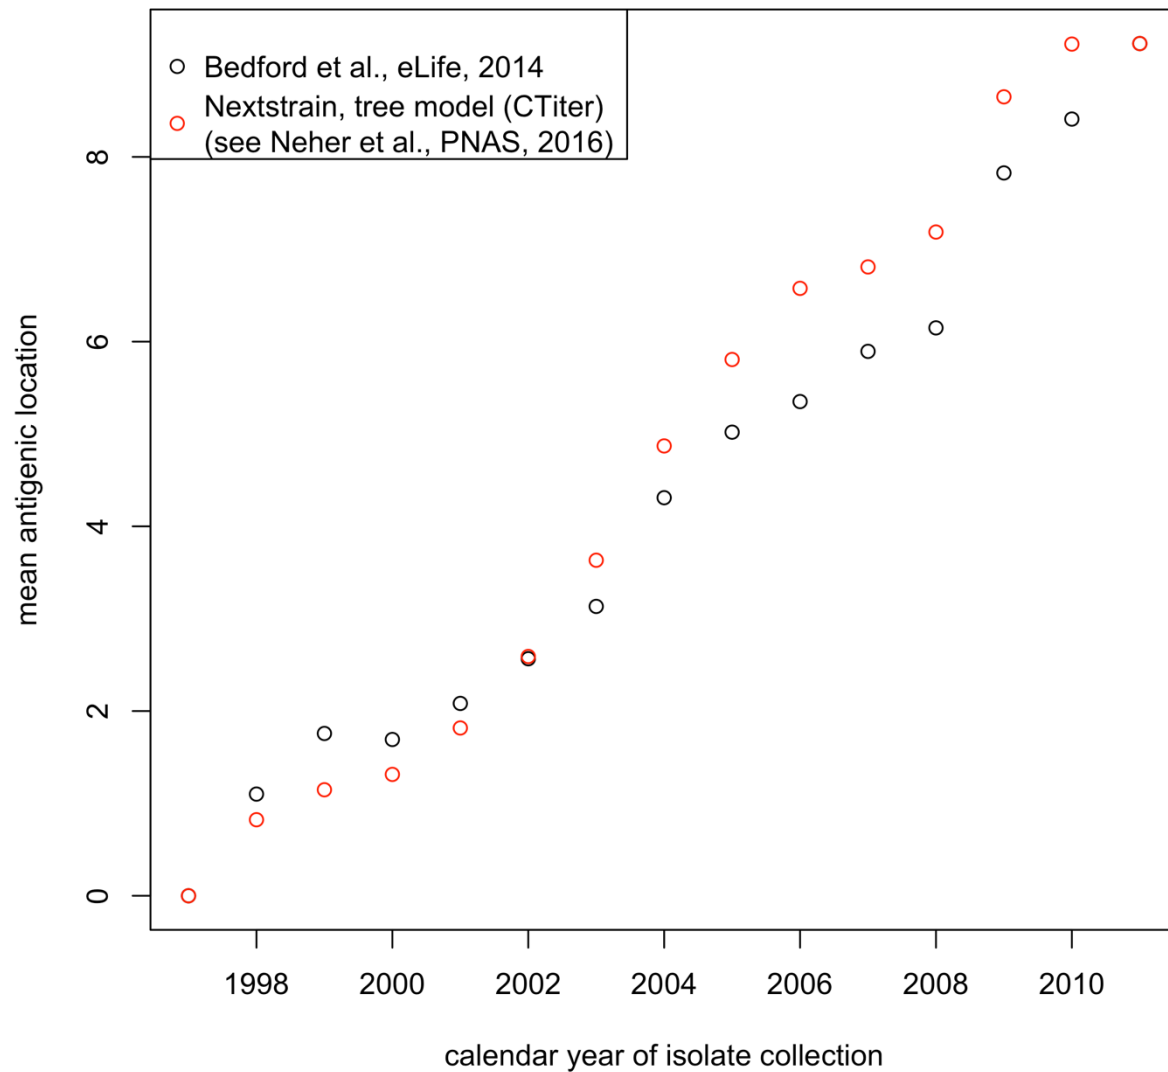

14  
 15 **Figure S3. Comparison of rescaled antigenic distance estimates from the Bedford et al., and**  
 16 **Nextstrain datasets.** Points represent average antigenic position of all isolates from a given calendar year.  
 17
